# Supplementary material
Source: Elsevier journal article supplement (https://www.sciencedirect.com/science/article/pii/S0300893217304505)
Supplement: mmc1 [file mmc1.pdf]

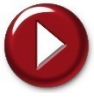

**Material suplementario**

---

**Estimulación ventricular izquierda a través de la guía del implante percutáneo de válvula aórtica**

---

**Video material suplementario**

Implante percutáneo de válvula Edwards-Sapien XT sobre válvula aórtica biológica previa (*valve-in-valve*) mediante estimulación con guía en el ventrículo izquierdo.
